# Supplementary material for: Fear of Infertility Among Women in Africa: A Scoping Review of Qualitative Evidence
Source: Research Square preprint supplement (doi:10.21203/rs.3.rs-7919584/v1), 2025-10-25
Supplement: Supplementary file 1 [file 4a0bbcc569be59f56f8df4df.docx]

## Additional File 3: Excluded Studies

|  | **Studies** | **Exclusion Explanation** |
| --- | --- | --- |
| **1** | Folkvord et al 2005  Male infertility in Zimbabwe | Fears related to current or future infertility is unmentioned |
| **2** | Klinger and Asgary 2017  Perceptions and attitudes regarding sexually transmitted infection and family planning among adolescents in northern Madagascar | Focus is not the perspective of infertile women |
| **3** | Morse et al. 2012  A qualitative assessment of Ugandan women’s perceptions and knowledge of contraception | Focus is not the perspective of infertile women |
| **4** | Castle 2003  Factors influencing young Malians’ reluctance to use hormonal contraceptives | Focus is not the perspective of infertile women |
| **5** | Gebremariam and Addissie 2014  Intention to use long acting and permanent contraceptive methods and factors affecting it among married women in Adigrat town, Tigray, northern Ethiopia. | Focus is not the perspective of infertile women |
| **6** | Chituka et al. 2019  Negative rumours about a vaginal ring for HIV-1 prevention in sub-Saharan Africa. | Focus is not the perspective of infertile women |
| **7** | Moyo 2013  Indigenous knowledge systems and attitudes towards male infertility in Mhondoro-Ngezi, Zimbabwe | Fears related to current or future infertility is unmentioned |
| **8** | Capurchande et al 2017  "If I have only two children and they die… who will take care of me?" - A qualitative study exploring knowledge, attitudes and practices about family planning among Mozambican female and male adults | Fears related to current or future infertility is unmentioned |
| **9** | Dalaba et al. 2016  A qualitative analysis of the effect of a community-based primary health care programme on reproductive preferences and contraceptive use among the Kassena-Nankana of northern Ghana | Fears related to current or future infertility is unmentioned |
| **10** | Cover et al. 2017  Acceptability of contracepive self-injection with DMPA-SC among adolescents in Gulu District, Uganda | Fears related to current or future infertility is unmentioned |
| **11** | Runganga et al. 2001  Culture, identity and reproductive failure in Zimbabwe. | Fears related to current or future infertility is unmentioned |
| **12** | Stuckenbruck and Roby 2017  Navigating uncharted terrain: Domestic adoptions in Kenya | Adoption |
| **13** | Oladokun et al 2009  Acceptability of child adoption as management option for infertility in Nigeria: Evidence from focus group discussions | Adoption |
| **14** | Coeytaux et al 1998  Induced abortion in sub-Saharan Africa: what we do and do not know | Fears related to current or future infertility is unmentioned |
| **15** | Hollos et al 2014  Women in limbo: Life course consequences of infertility in a Nigerian community | Fears related to current or future infertility is unmentioned |
| **16** | Remes et al. 2012  A qualitative study of HPV vaccine acceptability among health workers, teachers, parents, female pupils, and religious leaders in Northwest Tanzania. Vaccine | Fears related to current or future infertility is unmentioned |
| **17** | Chipeta et al 2010  Contraceptive knowledge, beliefs and attitudes in rural Malawi: misinformation, misbeliefs and misperceptions | Fears related to current or future infertility is unmentioned |
| **18** | Dhont et al. 2011  ‘Mama and papa nothing’: living with infertility among an urban population in Kigali, Rwanda | Fears related to current or future infertility is unmentioned |
| **19** | Hess et al. 2018  Infertility, psychological distress, and coping strategies among women in Mali, West Africa: a mixed-methods study. | Quantitative or survey methods incorporated |
| **20** | Dyer et al. 2002  Infertility in South Africa: Women’s reproductive health knowledge and treatment-seeking behaviour for involuntary childlessness. | Quantitative or survey methods incorporated |
| **21** | Ibisomi et al 2014  Childlessness in Nigeria: Perceptions and acceptability | Fears related to current or future infertility is unmentioned |
| **22** | Dierickx et al. 2018  I am always crying on the inside’: a qualitative study on the implications of infertility on women’s lives | Quantitative or survey methods incorporated |
| **23** | Koster 2010  Linking two opposites of pregnancy loss: induced abortion and infertility in Yoruba society | Quantitative or survey methods incorporated |
| **24** | Hyttel et al. 2012  Use of injectable hormonal contraceptives: diverging perspectives of women and men, service providers and policymakers in Uganda | Focus is not the perspective of infertile women |
| **25** | Dyer and Patel 2012  Dyer SJ, Patel M. The economic impact of infertility on women in developing countries - a systematic review | Systematic review |
| **26** | Hollos and Larsen 2008  Motherhood in sub-Saharan Africa: the social consequences of infertility in an urban population in northern Tanzania | Focus is not the perspective of infertile women |
| **27** | Upton and Dolan 2011  Sterility and stigma in an era of HIV/AIDS: narratives of risk assessment among men and women in Botswana | Focus is not the perspective of infertile women |
| **28** | Parrott 2014  ‘At the hospital I learnt the truth’: diagnosing male infertility in rural Malawi | Focus is not the perspective of infertile women |
| **29** | Nachinab et al 2018  Child adoption as a management alternative for infertility: A qualitative study in rural Northern Ghana | Adoption |
| **30** | Moyo and Muhwati 2013  Socio-cultural perspectives on causes and intervention strategies of male infertility: A case study of Mhondoro-Ngezi, Zimbabwe | Fears related to current or future infertility is unmentioned |
| **31** | Nieuwenhuis et al 2009  The impact of infertility on infertile men and women in Ibadan, Oyo State, Nigeria: a qualitative study | Fears related to current or future infertility is unmentioned |
| **32** | Nguimfack et al 2016  Brief report: A Cameroonian woman's cultural-bound experience of infertility | Fears related to current or future infertility is unmentioned |
| **33** | Ndwamato and Ogunbanjo 2009  The beliefs and practices of Tshivenda- speaking multiparous women on contraception: a qualitative study. | Focus is not the perspective of infertile women |
| **34** | Stanback and Twum-Baah 2001  Why do family planning providers restrict access to services? An examination in Ghana | Fears related to current or future infertility is unmentioned |
| **35** | Pedro and Faroa 2017  Exploring the lived experiences of infertility treatment and care by involuntarily childless women | Fears related to current or future infertility is unmentioned |
| **36** | Naab and Kwashie 2018  Observations on abortion in Zambia | Focus is not the perspective of infertile women |
| **37** | Tabong and Adongo 2013a/b  Infertility and childlessness: a qualitative study of the experiences of infertile couples in northern Ghana  Understanding the social meaning of infertility and childbearing: a qualitative study of the perception of childbearing and childlessness in northern Ghana | Focus is not the perspective of infertile women |
| **38** | Chebet et al. 2015  Observations on abortion in Zambia | Focus is not the perspective of infertile women |
| **39** | Adongo et al. 2014  A comparative qualitative study of misconceptions associated with contraceptive use in southern and northern Ghana. | Focus is not the perspective of infertile women |
| **40** | Yebei 2000  Unmet needs, beliefs and treatment-seeking for infertility among migrant Ghanaian women in the Netherlands | Fears related to current or future infertility is unmentioned |
| **41** | Richards 2002  "Spoiling the womb": definitions, aetiologies and responses to infertility in north west province, Cameroon | Fears related to current or future infertility is unmentioned |
| **42** | Donkor et al. 2017  ‘I am anxious and desperate’: psychological experiences of women with infertility in the Greater Accra region, Ghana | Quantitative or survey methods incorporated |
| **43** | Muanda et al. 2016  Barriers to modern contraceptive use in Kinshasa, DRC | Focus is not the perspective of infertile women |
| **44** | Nwobodo and Isah 2011  Knowledge, attitude and practice of child adoption among infertile female patients in Sokoto north-west Nigeria | Adoption |
| **45** | Capurchande et al. 2016  ‘It is challenging… oh, nobody likes it!’: A qualitative study exploring Mozambican adolescents and young adults’ experiences with contraception | Focus is not the perspective of infertile women |
| **46** | Lunsford et al. 2017  Environmental and psychosocial barriers to and benefits of cervical cancer screening in Kenya. | Focus is not the perspective of infertile women |
| **47** | Castle 1990  Observations on abortion in Zambia | Fears related to current or future infertility is unmentioned |
| **48** | Hollos 2003  Profiles of infertility in southern Nigeria: women's voices from Amakiri | Fears related to current or future infertility is unmentioned |
| **49** | Polis et al. 2018  There might be blood: a scoping review on women’s responses to contraceptive-induced menstrual bleeding changes. | Review |
| **50** | Ackerson and Zielinski 2017  Factors influencing use of family planning in women living in crisis affected areas of sub-Saharan Africa: a review of the literature. | Review |
| **51** | van Balen and Bos 2009  The economic impact of infertility on women in developing countries - a systematic review | Review |
| **52** | Daniele et al. 2017  A. Provider and lay perspectives on intra-uterine contraception: a global review | Systematic review |
| **53** | Williamson et al. 2009  Limits to modern contraceptive use among young women in developing countries: a systematic review of qualitative research | Systematic review |
