# Supplementary material for: Fear of Infertility Among Women in Africa: A Scoping Review of Qualitative Evidence
Source: Research Square preprint supplement (doi:10.21203/rs.3.rs-7919584/v1), 2025-10-25
Supplement: Supplementary file 2 [file 6a8d77a8e47d505c7286ad65.docx]

**Table 4: Descriptive Themes: Perceived Quality of Care**

| **Analytical Theme:**  **Perceived Quality of Care** | **Descriptive Theme:**  **Perceived Quality of Care** | **Summary of Findings** | **Illustrative Quote(s)** |
| --- | --- | --- | --- |
| Structure of the healthcare system: Access | 3.4.1 Physical hinderances affecting an individual’s ability to travel to treatment centres | The Gambia: During the first years of health seeking, decisions to start or continue treatment were based on the convenience of travelling. Additionally, multiple visits for a diagnosis with semen samples for analysis and possible treatment also increases the difficulty infertile women in The Gambia face in comparison to economically independent respondents who could travel abroad for more advanced biomedical diagnostic and treatment services. [36]  The Netherlands: A Dutch study highlighted that although some infertile Ghanaian women reported having a partner who resided in Ghana and visited occasionally, others reported that they lacked a stable relationship [44]. The absence of a spouse resulted in delayed or inaccessible fertility treatments as their consistent availability is expected during treatment [44].  Mozambique: Although half went principally to the hospital, all visited traditional healers at least once. Physical distance was not the main factor for fewer visits to the clinic - some traveled to famous healers further away though local ones most often used [45]. | "… I even travelled to Senegal and the price they charged me for the operation there, I couldn’t afford it. I came back to The Gambia and I agree for them to remove it together with the womb" [36] |
| Structure of the healthcare system: Affordability | 3.4.2 Transport costs | Mozambique: Respondents reported not travelling to the provincial capital, Pemba (200km away) due to lack of money (Gerrits 1997).  The Gambia: Economically independent respondents who could also travel abroad for more advanced biomedical diagnostic and treatment services tend to use fertility treatment more than those who were not [36] | "… Transport is not a big difference in terms of affordability" [36] |
| Patient-centred care: Folk Healing: Alternative and complementary explanations and therapies | 3.4.4 The costs of bewitching, muankoko and spiritual bondage | Nigeria, Mozambique and The Netherlands: It is assumed that expenses are not the main reason for fewer visits to the hospital in comparison to traditional healers as the respondents interviewed sometimes paid more for services offered by the latter than the former.  Women are prepared to spend more money on traditional treatment than ART when illness is perceived as being caused by:   1. Witchcraft: The untoward acts of people or witches (e.g., being given tea unknowingly made of particular medicinal plants or the victim of a secret spiritual ritual performed by, or at the request of, an adversary using belongings or body parts stolen from the subfertile woman in question); 2. Spiritual possession: Spirits ('majini' or 'maleika') are believed to prevent sexual intercourse with their spouse or be the underlying reason men refuse to remain committed to them; 3. Naturalistic causes such as the 'mismatch' of blood between spouses, 'muankoko' or 'norro' (gonorrhoea) which is thought to destroy their 'belly' or uterus   However, authors also highlight that affordability related to the level of treatment offered from traditional healers affects their likelihood of proceeding with it.  Most sub fertile women were treated with contraceptives, herbal teas, balms or baths that were either self administered at home or by herbalists who they perceived were competent enough to also diagnose and treat STDs.  Those that were deemed spiritually possessed were expected to undergo a more expensive exorcism ritual consisting of dancing, drumming, drinking herbal teas/ baths and offering of prayers to spirit beings. Treatment could also involve fortune tellers, indigenous healers or kanyaleng kafoo [36;42;43;44;45]. | "In the case of spirit possession women undergo an exorcism ritual… Some of the possessed women said they could not be treated in this way because they could not afford the expenses" [45]  "There is Mandinka medicine called ‘simanko la’ meaning ‘after dinner’, while others called it ‘nbenki’ meaning ‘aunty’. It has two different names but it is the same medicine. When you want to buy it, that’s the name you use but the real name is tobacco powder. People say it used to cure seketoo but I am not very sure because when you apply it, you end up crawling on the ground, that medicine is not a joke… It cause dizziness, and you will not be able to talk and it makes you vomit all the time… some encounter diarrhoea" [36]  "Somebody told me about one marabout at village X. When I went there he gave me holy water and some medicine but he also told me: 'be very careful because there is one person in your compound who didn’t want you to marry you husband' (Rural woman, [36])  "Before Jammeh (a marabout) left, nobody dared to talk about infertility. Nobody would say “you need to go to the hospital” because he had his own program. . . Some women claimed to be cured by him, however, they did not have many other options than to say this. You could not encourage people to go for a scan in the health centre" (Urban woman, [36]) |
| Structure of the healthcare system: Affordability | 3.4.2 Prescription Costs | The Gambia: Laboratory tests/ medicines purchased outside of the health sector deemed fertility treatment even under the public health sector too high for respondents to undertake [36] | "if you can pay for the health centre and the medication, you can also pay for the transport. Money is the only difficulty" [36] |
| Structure of the healthcare system: Affordability | 3.4.2 Treatment Costs | The Gambia, Botswana and The Netherlands: Due to existing wealth inequalities, the costs associated with the private health sector put fertility treatment out of reach for most (who had no insurance and were not financially independent)  Even with limited resources, women sought funds required to access the public health sector at least once or waited extensive periods of time between visits as they lacked immediate funds for direct payments required  The financial burden led some husbands to discourage treatment [36;41;44]  The social and economic problems of 'undocumented' Ghanaian women in The Netherlands were numerous and hindered their access to the national health insurance [44]. Although the interviewees were allowed to utilise ART, having low paying 'illegal’ jobs limited their ability to afford private health insurance or the direct payments required. For this reason, respondents opted to undertake alternative fertility treatments. Additionally, like the studies conducted in Africa and the UK [36;37;38;22;40;41;42;39;43;45], authors report that although public health insurance in the Netherlands also covers reproductive technology use, treatment costs are generally high. Limits to the number of treatment trials reimbursed by public health insurance bodies may subsequently affect the number of attempts that women may have preferred to undertake [44].  UK: Investing their funds into redundant treatments results in reconsideration of the emotional and practical costs and questioned their access to sufficient resources for treatment [38;39] | "You’re then saying to yourself 'Well, the chances of me getting pregnant naturally are sort of slim to none', you know, 'so if I don’t do it I give up. If I do do it, I’m borrowing money I don’t have'… I’m not sure I want to do that… for me at least the process is so physically demanding, so emotionally demanding. I wouldn’t want to do it again" [38] |
| Structure of the healthcare system: Availability | 3.4.3 Limited availability of Examinations and Treatment | Mozambique: The means to diagnose and treat the causes of infertility was limited. For example, (i) required medicine could only be purchased 200km away (ii) the only respondent that was able to be examined and treated in the hospital (in the capital, 200 km away) was married to an employee of the national health service [45]  The Gambia: Similarly, as most of the gynaecologists in The Gambia and Mozambique who work in either the public and private sector are located in the urbanised area, Banjul, ART was inaccessible to women in rural communities [42;36]  The Netherlands: Likewise, although all respondents in the Dutch study were using at least one biomedical treatment, issues with availability were heavily attributed to Dutch national health policy which prohibits fertility treatment to women beyond forty years old [44]. Ghanaian women elaborated they felt unwilling to cease treatment at forty years old due to a strong cultural belief that irrespective of their age, ovulation was a sign of fertility [44]. The author suggests this contributed to their grievance around the age restriction argument, which they found unconvincing as well as their specialist’s lack of consideration of their cultural background. Adequate availability of procedures offered by modern health care facilities was also questioned. For example, some women reported that medication and dietary advice were the only options available when suffering from fibroids and repeated miscarriages respectively.  As Dutch national health policy prohibits fertility treatment to women older than forty years old, women opted for treatment in neighbouring countries where no such policy restrictions exist [44]. | "They told me that the fibroid is very big and the instrument to be used for the operation so that it will not affect my womb is not available in this country, unless I travel aboard… I couldn’t afford it. I came back to The Gambia… to remove it together with the womb" [36] |
| Structure of the healthcare system: Availability | 3.4.3 Comprehensiveness of Care | Mozambique: Although respondents could describe the examinations, as they reported not receiving or understanding the results, authors question the comprehensiveness of care [45].    The Netherlands: Women were triggered by i) how unconvincing the argument for age restricted fertility treatment was and ii) inconsideration of their level of education or cultural background - they preferred to go to more 'understanding’ doctors in Belgium and Germany [44].  UK: The specificity of the current resilience model was questioned for inadequately addressing that following treatment failure when women are suffering high levels of distress, they may appraise their ability and intent to reattempt treatment (costs to emotional health, financial security and wider life goals). Additionally, after experiencing a failed ART attempt and being more aware that care professionals could not ensure success of all attempts, they sought answers they perceived their specialists were unable to provide. They expressed this made them feel empowered and helped relieve their despair [38].  Others felt elaboration of the possible causes of treatment failure increased their sense of trust and respect for staff as well as in clinical and scientific authority [39]. Authors also suggested it allowed younger couples to expand their thinking into other options if Preimplantation Genetic Diagnosis (PGD) is unsuccessful. However, the despondency older British couples felt regarding potentially undertaking alternative treatment options shared similarities with the respondents in the West and Southern African studies [41;40; 39;43;44]. British women were plagued by anxieties related to the 'spectre' of 'wasted' years and resources lost to repeated attempts, particularly those whose social lives and careers were disrupted whilst undertaking PGD [39]. It is thus unclear whether clinical practice is adequately sensitive to their burdens and comprehensiveness enough to adequately interrogate whether individuals have sufficient resources to prevent further depletion of their physical and mental wellbeing. | "… if you compare the way I go in and the terms I use, it’s like a professional talking… You don’t trust anyone any more you think you know the best" [38]  "… they talked through everything… they were brilliant. They were very clear. They explained everything really clearly and really like, not patronisingly but very simply, so you didn’t feel silly about asking questions about things. They showed us lots of pictures as well so it was like very easy to understand exactly what was happening. Um, they talked to us about how we felt about it, and sort of, I think, made sure that we understood exactly what was going on and… also made it very clear that it wasn’t you know, that the, the actual chances of it working… are—it’s not a certainty. You don’t say ‘‘Oh I’m having PGD so therefore I’m going to walk away with a baby" [39].  "… I can’t give my all to the job… I’ve got other issues at home!… What happens if things don’t go to plan, and we are childless? I’m not going to have a career to push myself into… I’ve kind of put that on hold!" [39]. |
| Structure of the healthcare system: Availability | 3.4.3 Continuity of Care | UK: Although women spent their time away from cycles accessing professional support or activating support networks, it was uncertain whether respondents sought this due to inadequate or non existent provision from their ART clinic [38]  Botswana: Believing they had exhausted all interventions, women emotionally distanced themselves from the struggle of 'denying' their needs by engaging in more community service, busying themselves with their career and discontinuing treatment [41]  These experiences provide insight into the invisible epidemic in which patients from poorer communities and suffering with multiple health problems (co-morbidities) are frequently subjected to fragmented care that often cause more harm than good.  Patients with complex co-morbidities may also present in similar ways to many ART clinics across the world - the amalgamation of precarity and multiple social traumas may cause or exacerbate existing psychological and physical illnesses. In this way, even women residing in high income countries with access to ART may be vulnerable and at high risk of being adversely affected by poorly integrated care and support services if they live in socially deprived communities and suffer from multiple health conditions [20-22]  For this reason, allow more time/space for women to talk about their lives and needs during consultations may allow deeper exploration of underlying complex problems. This may subsequently foster better integrated care that is more patient-centred, co-ordinated as well as individually tailored to their needs and empower them to shape the services they receive and challenge what falls short of what good quality care should look like [38]. | "I’ve always spoke to somebody around me that I know will just listen to me [...] they’ve given me that morale boost and put me back into my mental happy positive state" [38]. |
| Patient-centred care: Beyond Technical Execution of Care: Dignity, Trust, Respect and Humanised Care | 3.4.5 'Have they given up on me?': Developing alternative strategies to facilitate healing | The Netherlands: Women reported that they felt medical doctors hesitated to prescribe medicines which they believed led to quicker recovery [44]. | "Belgium doctors are very encouraging; it does not matter how old you are… (I) have to buy the medicine prescribed… Here [Netherlands] insurance pays for me and maybe that is why they [health system] are less helpful” [44] |
| Patient-centred care: Beyond Technical Execution of Care: Dignity, Trust, Respect and Humanised Care | 3.4.5 'Why are they [doctors] unhelpful?': Coming to terms with (i) An inability to meaningfully communicate with specialists and (ii) Loss of identity | The Netherlands and Mozambique: Inter-cultural misunderstanding led to the misinterpretation of clinical decisions, poor communication and rapport.  In order to investigate the adequacy of the processes of patient-centred care, authors explored the interpersonal interactions between staff and users. For example, respondents felt their treatment was ineffective as it was characterised mostly by 'endless tests' rather than medicines [44]. The author suggests believing that taking medicine is reflective of good treatment is the consequence of inter-cultural misunderstanding and possibly led to the misinterpretation of clinical decisions. Additionally, doctors were perceived as being indifferent and too technical in their approach. Respondents complained of insufficient feedback on their diagnosis and prognosis and recounted that they wanted to be informed of prognosis and management strategies. Research highlights the potential inadequacy of Dutch and Mozambican after care or counselling services and suggests this subsequently drives their need to pursue further treatment abroad with 'more understanding' Ghanaian doctors or spiritual healers and herbalists who more easily prescribe hormonal medicine [42;44].  For instance, treatments not comprehensively explained in English and group education sessions/ written information on treatments did not provide interpreters or translated materials from Dutch. Although support groups existed, they were unaware.  Additionally, although Mozambican research illustrates prescribed treatments from healers were not always efficacious, researchers still question whether an approach that does not allow women to 'release their pain', like holism does, is effective enough [42].  Some left The Netherlands to holiday in Ghana with the sole purpose of seeking treatment/ alternative strategies with spiritual healers or herbalists [44] | "… many of the respondents went to "more understanding doctors" in Ghana for further treatment. There they were more easily prescribed hormonal drugs and freshly prepared herbs" [44] |
| Patient-centred care: Beyond Technical Execution of Care: Dignity, Trust, Respect and Humanised Care | 3.4.6 Acceptability of care | Africa and The Netherlands: Limited availability of gynaecologists in rural areas of The Gambia and Mozambique influenced complaints relating to the need to receive care more promptly [36;42]. The need for prior appointment before treatment, accompaniment of spouse as well as scheduling difficulties experienced whilst arranging appointments may be indicative of institutional barriers. It is possible that the reduced availability of doctors contributed to longer waiting times and dissatisfaction.  Specialists’ attempts to reassure Dutch users that they were "all right" and could bear children without further intervention made them feel that specialists did not demonstrate a capacity to listen attentively or consider their cultural and religious needs [44]. As attentive listening facilitates good communication and understanding of the individual physical, psychological and social dimensions of the user, the lack of attention from specialists appeared to increase the distance between them and result in negative evaluation. Communication was also perceived as being unsatisfactory because the information they deemed necessary about subfertility and treatment to resolve their concerns was unprovided. The extent to which this information was understood may have been limited by language difference between Dutch speaking specialists and the English or Ghanaian speaking users. Positive specialist-user relations beyond technical aspects may strengthen confidentiality, dignity and humanised care.  The Netherlands, The Gambia and Mozambique: Communication, access and waiting times were negatively evaluated - reduced availability of specialists, lack of attentiveness around the psychosocial dimensions of the user, requirement of spouse at appointments and scheduling difficulties acted as institutional barriers which contributed to longer waiting times and dissatisfaction [36;42;44] | "They told me that the fibroid is very big and the instrument to be used for the operation so that it will not affect my womb is not available in this country, unless I travel aboard. So, I even travelled to Senegal and the price they charged me for the operation there, I couldn’t afford it. I came back to The Gambia and I agree for them to remove it together with the womb" (Urban infertile woman, [36])  "There was a man who fooled me. Still now I won’t forget. He said he is a medical nurse, he said I have an UTI… that is seketoo. In our tradition we have the believe that it can be cut. Now I know that I do not have it but at first I thought it was true and that I had it. He wanted to have money from my husband and the nurse said the solution is to cut it out and my husband asked him the price, he said D1000 [21 USD] [laughing]… my husband gave the nurse the money… when I went to his place, on the whole he did not know what is an UTI. So, he was checking me and touched my clitoris and I told him 'that’s not the one'. Then I told him: 'you have taken the money just go your way'" [36] |
