# Supplementary material for: Fear of Infertility Among Women in Africa: A Scoping Review of Qualitative Evidence
Source: Research Square preprint supplement (doi:10.21203/rs.3.rs-7919584/v1), 2025-10-25
Supplement: Supplementary file 3 [file 8d3d6fb3b5c59c147971cf49.docx]

**Additional File 2: PRISMA-ScR (Preferred Reporting Items for Systematic reviews and Meta-Analyses for Scoping Reviews)**

| **Section/ Topic** | **#** | **Checklist Item** | **Reported on page #** |
| --- | --- | --- | --- |
| Title |  |  |  |
| Title | 1 | Identify the report as a scoping review. | 1 |
| Abstract |  |  |  |
| Structured summary | 2 | Provide structured summary including as applicable backgrounds objectives; data sources; study eligibility criteria, participants and interventions; study appraisal and synthesis methods; results; limitations; conclusions and implications of key findings; systematic review registration number. | 2 |
| Introduction |  |  |  |
| Rationale | 3 | Describe and explain the rationale for the review in the context of what is already known, ensuring alignment with a scoping review protocol | 3, 4 |
| Objectives | 4 | Provide an explicit statement of questions being addressed with reference to participants, interventions, comparisons, outcomes and study design (PICOS). | 4 |
| Methods |  |  |  |
| Protocol and registration | 5 | Indicate if a review protocol exists, if and where it can be accessed (e.g., Web address), and if available provide registration information including a registration number | 5 |
| Eligibility criteria | 6 | Specify study characteristics (e.g., PICOS, length of follow-up) and report characteristics (e.g., years considered, language, publication status) used as criteria for eligibility giving rationale | 5 |
| Information sources | 7 | Describe all information sources (e.g., databases with dates of coverage, contact with study authors to identify additional studies) in the search and date last searched. | 5 |
| Search | 8 | Present full electronic search strategy for at least one database, including any limits used such that it could be repeated | Additional File 1 |
| Selection of sources of evidence | 9 | State the process for selecting studies (i.e. screening and eligibility included in systematic review and if applicable included in the meta-analysis) | 5 |
| Data collection process | 10 | Describe method of data extraction from reports (e.g., piloted forms, independently by two reviewers) and any processes for obtaining and confirming data from investigators | 4, 6 |
| Data items | 11 | List and define all variables for which data were sought (e.g., PICOS, funding sources) and any assumptions and simplifications made | 6 |
| Risk of bias in individual studies | 12 | If done, describe methods used for assessing risk of bias of individual studies (including specification of whether this was done at the study or outcome level) and how this information is to be used in any data synthesis | 6 |
| Summary measures | 13 | If done state the principal summary measures (e.g., risk ratio, different in means) | Not applicable |
| Synthesis of results | 14 | Describe the methods of handling data and combining results of studies, if done, including measures of consistency (e.g., I2) for each meta-analysis | 6 |
| Risk of bias across studies | 15 | If done, specify any assessment of risk of bias that may affect the cumulative evidence (E.g., publication bias, selective reporting within studies) | Not applicable |
| Additional analyses | 16 | Describe methods of additional analyses (e.g., sensitivity or group analyses, meta-regression) done, indicating which were pre-specified | Not applicable |
| Results |  |  |  |
| Study selection | 17 | Give numbers of studies screened, assessed for eligibility, and included in the review, with reasons for exclusions at each stage, ideally with a flow diagram | Fig. 1  Additional File 3 |
| Study characteristics | 18 | For each study, present characteristics for which data were extracted (e.g., study size, PICOS, follow-up period) and provide the citations. | 7-9  Table 1 and 2 |
| Risk of bias within studies | 19 | If done, present data on risk of bias of each study and, if available, any outcome level assessment (see item 12) | Not applicable |
| Results of individual studies | 20 | For all outcomes considered (benefits or harms), present, for each study: the relevant data extracted that relates to review questions and objectives | Additional File 4 and 5 |
| Synthesis of results | 21 | Summarise and/or present the extracted results, ensuring alignment with review questions and objectives | 10-15 |
| Risk of bias across studies | 22 | If done, present results of any assessment of risk of bias across studies (see Item 15). | Not applicable |
| Additional analysis | 23 | If done, give results of additional analyses, if done (e.g., sensitivity or subgroup analyses, meta-regression [see Item 16]). | Not applicable |
| Discussion |  |  |  |
| Summary of evidence | 24 | Summarise the main findings including the strength of evidence for each main outcome; consider their relevance to key groups (e.g., healthcare providers, users and policy makers). | 15-16 |
| Limitations | 25 | Discuss limitations at study and outcome level (e.g., risk of bias), and at review-level (e.g., incomplete retrieval of identified research, reporting bias). | 17 |
| Conclusions | 26 | Provide a general interpretation of the results in the context of other evidence and implications for future research. | 18 |
| Funding |  |  |  |
| Funding | 27 | Describe sources of funding for the scoping review and other support (e.g., supply of data); role of funders for the scoping review. | 18 |
