# Supplementary material for: Fear of Infertility Among Women in Africa: A Scoping Review of Qualitative Evidence
Source: Research Square preprint supplement (doi:10.21203/rs.3.rs-7919584/v1), 2025-10-25
Supplement: Supplementary file 4 [file a62a879b9496ae155d792777.docx]

## Search Strategy: Ovid MEDLINE(R) <1946 to 12 October 2025>

| 1 | fear.tw (90249) |
| --- | --- |
| 2 | Exp fear/ (22171) |
| 3 | 1 or 2 (90736) |
| 4 | infert*.tw. (76072) |
| 5 | childless*.tw. (1859) |
| 6 | sterility.tw. (12719) |
| 7 | infecundity.tw. (54) |
| 8 | subfecundity.tw. (141) |
| 9 | exp *Infertility, Female/ or exp *Infertility/ (46833) |
| 10 | 4 or 5 or 6 or 7 or 8 or 9 (102760) |
| 11 | exp *Africa, West/ or exp *Africa, Southern/ or Africa, Central/ or exp *Africa, Eastern/ or exp *Africa, Central/ or exp *"Africa South of the Sahara"/ or exp *Africa/ or exp *Africa, Northern/ (1690) |
| 12 | africa*.tw. (188563) |
| 13 | exp *developing countries.tw. (30018) |
| 14 | (poor resource* and (setting* or area* or countr* or region*)).tw. (240) |
| 15 | (low resource* and (setting* or area* or countr* or region*)).tw. (9641) |
| 16 | (africa* or Algeria or Angola or Benin or Botswana or Burkina Faso or Burundi or Cabo Verde or Cameroon or Chad or Comoros or Congo or Cote d'Ivoire).tw. (364847) |
| 17 | (Djibouti or Egypt or Equatorial Guinea or Eritrea or Eswatini or Swaziland or Ethiopia or Gabon or Gambia or Ghana or Guinea or Guinea-Bissau).tw. (206307) |
| 18 | (Kenya or Lesotho or Liberia or Libya or Madagascar or Malawi or Mali or Mauritania or Mauritius or Morocco or Mozambique or Namibia or Niger or Nigeria or Rwanda).tw. (117279) |
| 19 | ((Sao Tome and Principe) or Senegal or Seychelles or Sierra Leone or Somalia or Sudan or Tanzania or Togo or Tunisia or Uganda or Zambia or Zimbabwe).tw. (81167) |
| 20 | 11 or 12 or 13 or 14 or 15 or 16 or 17 or 18 or 19 (792963) |
| 21 | 3 and 10 and 20 (60) |
| 22 | limit 21 to english language, humans, primary qualitative studies and women aged 19+ (9) |

Additional File 1: Search strategy

NB: As qualitative research is often regarded as subjective, it was important to ensure that the fear of infertility was well defined to ensure I was sensitive to studies that were and were not relevant during the screening process. Thus, although having a second person screening for risk of bias may have been beneficial, for this systematic review, it was not essential in the formation of a robust and reliable answer. Therefore, it is unlikely that the inclusion of a second reviewer would have resulted in a different conclusion.
