# Supplementary material for: Fear of Infertility Among Women in Africa: A Scoping Review of Qualitative Evidence
Source: Research Square preprint supplement (doi:10.21203/rs.3.rs-7919584/v1), 2025-10-25
Supplement: Supplementary file 5 [file bc28b8d324df5e468523648f.docx]

## Supplementary File 5: Perceived Fears in Included Studies for Ramifications of Infertility

| **Author(s)** | **Age** | **Country** | **Perceived or Actual Fears** |
| --- | --- | --- | --- |
| Fledderjohann 2012 [35] | 21-48 | Ghana | - Marital instability (infidelity, divorce and domestic violence) - Social strain (ostracism): Verbal assault, insult, focus of gossip, duplicitous friendships, volatile relationships with the marital family - Mental health: Loneliness, anxiety, symptoms of depression, insomnia and stress relating to social stigmatisation and marriages - Abortions are believed to be associated with the possibility of ‘damage to the womb’ |
| Mabasa 2002 [36] | 25-48 | South Africa | - Marital instability (conflict, infidelity, being forced to enter a polygamous marital relationship, divorce) - Ostracism: Example, Fertile co-wives mocking infertile co-wife with hurtful songs about infertility - Economic instability (children are an investment in the future who will ‘ensure the continuation of the family’ - Stigmatisation: Women reported that they tended to solely bear the stigma of infertility (in some cases, even for their partner) from the community and marital family) - Mental Health: Including anxiety, grief, depression |
| Kamau 2012 [41] | 29-54 | Kenya | - Marital instability: Divorce, separation - Social strain: Disingenuous friendships |
| Gerrits [42] | 19-50 | Mozambique | - Further security: Having no one to mourn or bury them; lack of support now or in the future (e.g., “who will construct a house or improve the existing one when they are old?”); being abandoned by adopted children who may want to return to their parents when they are older) - Exclusion from important social activities and ceremonies for fear their relatives will be afflicted with serious health issues (e.g., not allowed to assist deliveries or be in places where the dead are washed or placed upon a bier. - Fear that family will die out or only child will be left without a network once parents have died - Missing out on the joys of motherhood: Having a “compound without children is considered a place without pleasure” - In patrilineally organised ethnic groups, fear of mistreatment from marital family. - Marital strain: Husbands having extramarital relationships (“a man is a man”) |
| Feldman-Savelsberg 1994 [43] | Unreported | Cameroon | - Economic and social vulnerability: infertility increases the risk of of Bangangte women of becoming poor - Marital instability: Divorce, adultery - Animosity from co-wives, mothers-in-law and neighbours motivated by envy to inflict fertility using native medicine/witchcraft - Mental health: Anxiety |
